# Supplementary material
Source: publisher figshare collection journal article supplement (https://frontiersin.figshare.com/ndownloader/files/22026846)
Supplement: Supplementary file [file 22026846]

**Supplementary Material 3:** Top eight functional annotation clusters associated with proteins in Dispersed and Basal clusters (Annotation clusters 1-5,  $P < 0.01$ ). Also refer to Figure 2F and 2G.

| Annotation cluster | Description                                         | Enrichment Score | P value  | Adjusted P values |
|--------------------|-----------------------------------------------------|------------------|----------|-------------------|
| 1                  | GTP binding and activity                            | 10               | 1.06E-10 | 3.67E-08          |
| 2                  | Cell-cell adherens junction and cadherin binding    | 7                | 6.75E-09 | 2.61E-06          |
| 3                  | Small GTPase mediated signal transduction           | 7                | 3.19E-07 | 5.60E-04          |
| 4                  | Ribosome, translation, RNA processing               | 3                | 1.46E-05 | 5.65E-03          |
| 5                  | ATPase, and regulation of cardiac conduction ATPase | 3                | 1.03E-04 | 4.65E-03          |
| 6                  | GDP and GMP metabolic process                       | 2                | 7.74E-04 | 7.44E-01          |
| 7                  | Mitochondrial respiratory chain                     | 2                | 1.37E-03 | 4.11E-01          |
| 8                  | Clathrin coat                                       | 2                | 4.06E-03 | 7.93E-01          |

### Basal cluster

| Annotation cluster | Description                                                                                   | Enrichment Score | P value  | Adjusted P value |
|--------------------|-----------------------------------------------------------------------------------------------|------------------|----------|------------------|
| 1                  | Ribosome, translation, RNA processing                                                         | 18               | 3.54E-17 | 1.79E-14         |
| 2                  | Cell-cell adherens junction and cadherin binding                                              | 10               | 3.82E-11 | 1.93E-08         |
| 3                  | GTP binding and activity                                                                      | 9                | 1.09E-09 | 4.31E-07         |
| 4                  | Anaphase-promoting complex-dependent catabolic process, and ubiquitin-protein ligase activity | 4                | 2.16E-05 | 4.92E-02         |
| 5                  | Regulation of cellular amino acid metabolic process, and proteasome activity                  | 3                | 1.22E-04 | 2.07E-02         |
| 6                  | T cell receptor signalling pathway                                                            | 3                | 6.86E-05 | 1.48E-01         |
| 7                  | Wnt signalling pathway                                                                        | 3                | 4.12E-04 | 6.18E-01         |
| 8                  | Proteasome core complex                                                                       | 3                | 1.11E-03 | 4.30E-01         |
